# Supplementary material for: Effect of functionalized graphene oxide with hyperbranched POSS polymer on mechanical and dielectric properties of cyanate ester composites
Source: Royal Society of Chemistry journal article supplement (doi:10.1039/c6ra01053a), 2016-01-01
Supplement: c6ra01053a1.pdf [file c6ra01053a1.pdf]

**Table S1 The Impact and flexural strengths of DCPDCE resin and HPP-GO/DCPDCE composites**

| samples               | Impact strength (KJ/m <sup>2</sup> ) | flexural strength (MPa) |
|-----------------------|--------------------------------------|-------------------------|
| DCPDCE                | 9.5                                  | 94.0                    |
| 0.2 wt% HPP-GO/DCPDCE | 10.7                                 | 104.0                   |
| 0.4 wt% HPP-GO/DCPDCE | 13.3                                 | 117.0                   |
| 0.6 wt% HPP-GO/DCPDCE | 16.8                                 | 146.3                   |
| 0.8 wt% HPP-GO/DCPDCE | 17.5                                 | 136.9                   |

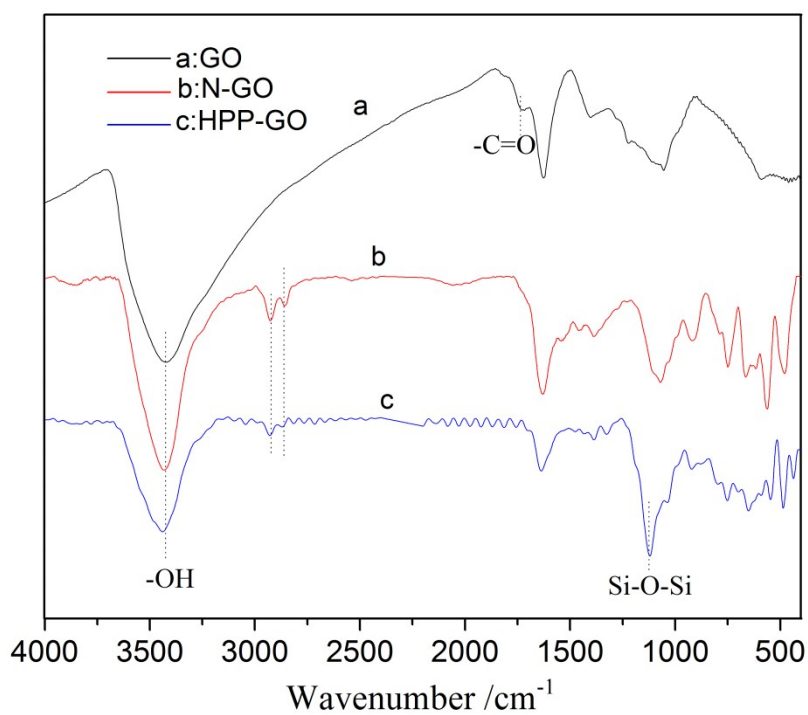

Fig S1
